# Supplementary material for: Gene Variants of TCF7L2 Influence Weight Loss and Body Composition During Lifestyle Intervention in a Population at Risk for Type 2 Diabetes
Source: PubMed Central journal article supplement — Diabetes. 2009 Dec 22;59(3):747–50. doi: 10.2337/db09-1050 (PMC2828665; doi:10.2337/db09-1050), 2009-12-22
Supplement: supp_db09-1050_supplementtableR2.pdf [file supp_db09-1050_supplementtableR2.pdf]

Suppl. Table 1. Associations of *TCF7L2* SNP rs7903146 with changes in anthropometric and metabolic parameters during lifestyle intervention after stratification for gender.

| <i>TCF7L2</i>                                                           | female   |          |              | male     |          |               |
|-------------------------------------------------------------------------|----------|----------|--------------|----------|----------|---------------|
| rs7903146                                                               | CC       | XT       | p            | CC       | XT       | p             |
| n                                                                       | 95       | 99       |              | 53       | 62       |               |
| Δ BMI(kg/m <sup>2</sup> )                                               | -1.1±1.7 | -0.6±1.6 | <b>0.017</b> | -1.2±1.4 | -0.8±1.2 | 0.1           |
| Δ total body fat %                                                      | -1.4±4.6 | 0.1±4.2  | <b>0.044</b> | -2.2±4.3 | -1.4±4.2 | 0.5           |
| Δ fasting glucose (mmol/l)                                              | -0.1±0.4 | 0.0±0.4  | 0.2          | -0.2±0.4 | -0.1±0.4 | 0.2           |
| Δ glucose <sub>120-min</sub> (mmol/l)                                   | -0.1±1.6 | -0.3±1.5 | 0.4          | -0.4±1.5 | -0.5±1.5 | 0.9           |
| Δ AUC <sub>C-Peptide</sub> /AUC <sub>Glucose</sub> (x10 <sup>-9</sup> ) | 0.6±66   | 8.3±69   | 0.9          | -8.4±96  | -9.8±71  | 0.6           |
| Δ insulin sensitivity (AU)                                              | 1.9±6.0  | 0.6±6.3  | 0.2          | 2.7±6.0  | 3.1±6.3  | 0.7           |
| Δ NVAT (kg)*                                                            | -2.3±3.6 | -1.1±3.3 | 0.1          | -3.4±3.4 | -1.6±2.5 | <b>0.0017</b> |
| Δ VAT (kg)*                                                             | -0.4±0.5 | -0.2±0.4 | 0.09         | -0.8±0.8 | -0.5±0.9 | <b>0.04</b>   |
| Δ Liver fat content (% of water signal)*                                | -2.1±6.0 | -0.3±1.6 | 0.4          | -4.4±8.3 | -2.4±5.8 | 0.1           |

Data represent means ± SD. BMI and total body fat were adjusted for age. Glucose concentration, insulin secretion and insulin sensitivity were additionally adjusted for BMI.  $\Delta = T_{\text{follow up}} - T_{\text{baseline}}$ . The change in the parameters were additionally adjusted for baseline values. The change in glucose concentration, insulin secretion and insulin sensitivity were adjusted for the change in BMI. Data were statistically analyzed by multivariate linear regression analysis in the dominant inheritance model. \* MRI/MRS subcohort.

Suppl. Table 2. Associations of *TCF7L2* SNP rs7903146 with changes in anthropometric and metabolic parameters during lifestyle intervention after stratification for age

| <i>TCF7L2</i>                                                           | Age≤47   |          |               | Age>47   |          |     |
|-------------------------------------------------------------------------|----------|----------|---------------|----------|----------|-----|
| rs7903146                                                               | CC       | XT       | p             | CC       | XT       | p   |
| n                                                                       | 78       | 74       |               | 70       | 87       |     |
| Δ BMI(kg/m <sup>2</sup> )                                               | -1.2±1.6 | -0.8±1.6 | <b>0.0095</b> | -1.2±1.7 | -0.5±1.4 | 0.1 |
| Δ total body fat %                                                      | -1.6±4.1 | 0.3±3.8  | 0.4           | -1.9±4.8 | -0.5±4.7 | 0.1 |
| Δ fasting glucose (mmol/l)                                              | -0.1±0.4 | 0.1±0.4  | 0.09          | -0.2±0.4 | 0.0±0.5  | 0.5 |
| Δ glucose <sub>120-min</sub> (mmol/l)                                   | -0.4±1.8 | -0.4±1.6 | 0.3           | -0.1±1.3 | -0.4±1.4 | 0.9 |
| Δ AUC <sub>C-Peptide</sub> /AUC <sub>Glucose</sub> (x10 <sup>-9</sup> ) | 12±78    | 3±70     | 0.4           | -15±75   | 0±71     | 0.2 |
| Δ insulin sensitivity (AU)                                              | 2.0±5.6  | 1.8±5.6  | 0.8           | 2.3±6.4  | 1.1±7.1  | 0.5 |
| Δ NVAT (kg)                                                             | -2.7±2.8 | -1.0±2.4 | 0.06          | -2.7±4.1 | -1.6±3.4 | 0.1 |
| Δ VAT (kg)                                                              | -0.5±0.6 | -0.3±0.7 | <b>0.01</b>   | -0.6±0.6 | -0.3±0.6 | 0.4 |
| Δ Liver fat content (% of water signal)*                                | -1.9±5.3 | -1.0±3.3 | 0.4           | -3.9±8.2 | -1.4±4.8 | 0.2 |

Data represent means ± SD. BMI and total body fat were adjusted for sex. Glucose concentration, insulin secretion and insulin sensitivity were additionally adjusted for BMI.  $\Delta = T_{\text{follow up}} - T_{\text{baseline}}$ . The change in the parameters were additionally adjusted for baseline values. The change in glucose concentration, insulin secretion and insulin sensitivity were adjusted for the change in BMI. Data were statistically analyzed by multivariate linear regression analysis in the dominant inheritance model.\* MRI/MRS subcohort.

Suppl. Table 3. Associations of SNP rs12255372 in *TCF7L2* with anthropometric and metabolic parameters in the cross-sectional setting and with changes in these parameters during lifestyle intervention

| Genotype                                                              | GG           | XT         | p    | p2   |                                                    | GG       | XT       | p             | p2            |
|-----------------------------------------------------------------------|--------------|------------|------|------|----------------------------------------------------|----------|----------|---------------|---------------|
| N (f/m)                                                               | 161 (103/58) | 148(91/57) | -    |      |                                                    |          |          |               |               |
| Age (years)                                                           | 46±11        | 46±12      | -    |      |                                                    |          |          |               |               |
| BMI (kg/m <sup>2</sup> )                                              | 30.3±5.4     | 29.9±5.8   | 0.4  | 0.4  | Δ BMI                                              | -1.1±1.6 | -0.7±1.5 | <b>0.0046</b> | <b>0.0126</b> |
| Total body fat (%)                                                    | 33.5±8.6     | 32.6±8.6   | 0.4  | 0.3  | Δ total body fat                                   | -1.6±4.5 | -0.5±4.2 | <b>0.0127</b> | 0.06          |
| Fasting glucose (mmol/l)                                              | 5.3±0.5      | 5.3±0.5    | 0.9  | 0.9  | Δ fasting glucose                                  | -0.1±0.4 | 0.1±0.4  | 0.7           | 0.6           |
| glucose <sub>120-min</sub> (mmol/l)                                   | 6.9±1.6      | 7.1±1.6    | 0.07 | 0.2  | Δ glucose <sub>120-min</sub>                       | -0.2±1.6 | -0.4±1.5 | 0.5           | 0.8           |
| AUC <sub>C-Peptide</sub> /AUC <sub>Glucose</sub> (x10 <sup>-9</sup> ) | 314±96       | 297±87     | 0.1  | 0.09 | Δ AUC <sub>C-Peptide</sub> /AUC <sub>Glucose</sub> | -3.7±76  | 3.0±71   | 0.8           | 0.4           |
| Insulin sensitivity, OGTT (AU)                                        | 12.4±6.8     | 13.2±6.9   | 0.4  | 0.5  | Δ insulin sensitivity, OGTT                        | 2.0±6.1  | 1.6±6.4  | 0.3           | 0.4           |
| Non visceral fat (kg)*                                                | 23.4±9.6     | 23.0±10.3  | 0.7  | 1.0  | Δ Non visceral fat                                 | -2.7±3.5 | -1.3±3.0 | <b>0.0022</b> | 0.054         |
| Visceral fat (kg)*                                                    | 3.1±1.8      | 2.9±1.8    | 0.3  | 0.4  | Δ Visceral fat                                     | -0.5±0.6 | -0.3±0.6 | <b>0.0086</b> | <b>0.0142</b> |
| Liver fat content (% of water signal)*                                | 7.7±9.6      | 5.4±6.2    | 0.2  | 0.2  | Δ Liver fat content                                | -2.9±7.0 | -1.1±4.0 | 0.4           | 0.7           |

Data represent means ± SD. BMI and total body fat were adjusted for sex and age. Glucose concentration, insulin secretion and insulin sensitivity were additionally adjusted for BMI.  $\Delta = T_{\text{follow up}} - T_{\text{baseline}}$ . The change in the parameters were additionally adjusted for baseline values. The change in glucose concentration, insulin secretion and insulin sensitivity were adjusted for the change in BMI. Data were statistically analyzed by multivariate linear regression analysis in the dominant inheritance model, p1, and the additive inheritance model, p2. \* MRI/MRS subcohort.

Suppl. Table 4. Associations of SNP rs7895340 in *TCF7L2* with anthropometric and metabolic parameters in the cross-sectional setting and with changes in these parameters during lifestyle intervention

| Genotype                                                              | AA        | XG          | p   | p2  |                                                    | AA       | XG       | p    | p2  |
|-----------------------------------------------------------------------|-----------|-------------|-----|-----|----------------------------------------------------|----------|----------|------|-----|
| N (f/m)                                                               | 88(54/34) | 217(137/80) |     |     |                                                    |          |          |      |     |
| Age (years)                                                           | 44±11     | 47±11       |     |     |                                                    |          |          |      |     |
| BMI (kg/m <sup>2</sup> )                                              | 30.2±5.3  | 30.1±5.7    | 1.0 | 0.9 | Δ BMI                                              | -1.0±1.6 | -0.9±1.6 | 0.9  | 1.0 |
| Total body fat (%)                                                    | 33.6±8.3  | 32.9±8.7    | 0.4 | 0.3 | Δ total body fat                                   | -1.3±4.2 | -1.0±4.5 | 0.9  | 0.8 |
| Fasting glucose (mmol/l)                                              | 5.2±0.5   | 5.3±0.5     | 0.9 | 1.0 | Δ fasting glucose                                  | -0.1±0.4 | -0.1±0.4 | 0.4  | 0.4 |
| glucose <sub>120-min</sub> (mmol/l)                                   | 7.0±1.6   | 7.0±1.6     | 0.5 | 0.2 | Δ glucose <sub>120-min</sub>                       | -0.4±1.5 | -0.3±1.6 | 0.6  | 0.7 |
| AUC <sub>C-Peptide</sub> /AUC <sub>Glucose</sub> (x10 <sup>-9</sup> ) | 310±87    | 304±94      | 0.6 | 0.3 | Δ AUC <sub>C-Peptide</sub> /AUC <sub>Glucose</sub> | -10±73   | -4.5±71  | 0.06 | 0.2 |
| Insulin sensitivity, OGTT (AU)                                        | 11.9±6.8  | 13.1±6.9    | 0.2 | 0.8 | Δ insulin sensitivity, OGTT                        | 1.7±6.2  | 1.9±6.3  | 0.4  | 0.7 |
| Non visceral fat (kg)*                                                | 23.4±10.0 | 23.0±10.0   | 0.9 | 0.8 | Δ Non visceral fat                                 | -2.1±3.2 | -1.9±3.4 | 0.8  | 0.9 |
| Visceral fat (kg)*                                                    | 3.1±1.9   | 2.9±1.8     | 0.4 | 0.2 | Δ Visceral fat                                     | -0.5±0.6 | -0.4±0.6 | 0.9  | 1.0 |
| Liver fat content (% of water signal)*                                | 6.9±9.6   | 5.2±5.7     | 0.3 | 0.1 | Δ Liver fat content                                | -2.4±5.4 | -1.9±6.0 | 0.8  | 0.6 |

Data represent means ± SD. BMI and total body fat were adjusted for sex and age. Glucose concentration, insulin secretion and insulin sensitivity were additionally adjusted for BMI.  $\Delta = T_{\text{follow up}} - T_{\text{baseline}}$ . The change in the parameters were additionally adjusted for baseline values. The change in glucose concentration, insulin secretion and insulin sensitivity were adjusted for the change in BMI. Data were statistically analyzed by multivariate linear regression analysis in the dominant inheritance model, p1, and the additive inheritance model, p2. \* MRI/MRS subcohort.

Suppl. Table 5. Associations of SNP rs11196205 in *TCF7L2* with anthropometric and metabolic parameters in the cross-sectional setting and with changes in these parameters during lifestyle intervention

| Genotype                                                              | CC        | XG       | p    | p2   |                                                    | CC       | XG       | p    | p2  |
|-----------------------------------------------------------------------|-----------|----------|------|------|----------------------------------------------------|----------|----------|------|-----|
| N (f/m)                                                               | 82        | 223      |      |      |                                                    |          |          |      |     |
| Age (years)                                                           | 45±11     | 46±11    |      |      |                                                    |          |          |      |     |
| BMI (kg/m <sup>2</sup> )                                              | 30.3±5.5  | 30.1±5.7 | 0.8  | 0.9  | Δ BMI                                              | -1.0±1.6 | -0.9±1.6 | 0.5  | 0.8 |
| Total body fat (%)                                                    | 33.6±8.2  | 32.9±8.7 | 0.3  | 0.4  | Δ total body fat                                   | -1.3±4.5 | -0.9±4.2 | 0.9  | 0.8 |
| Fasting glucose (mmol/l)                                              | 5.3±0.5   | 5.3±0.5  | 0.9  | 1.0  | Δ fasting glucose                                  | -0.1±0.4 | 0.1±0.4  | 0.6  | 0.6 |
| glucose <sub>120-min</sub> (mmol/l)                                   | 7.0±1.5   | 7.0±1.6  | 0.5  | 0.1  | Δ glucose <sub>120-min</sub>                       | -0.4±1.6 | -0.3±1.6 | 0.5  | 0.5 |
| AUC <sub>C-Peptide</sub> /AUC <sub>Glucose</sub> (x10 <sup>-9</sup> ) | 311±89    | 304±93   | 0.6  | 0.8  | Δ AUC <sub>C-Peptide</sub> /AUC <sub>Glucose</sub> | 9.1±76   | -3.8±73  | 0.09 | 0.2 |
| Insulin sensitivity, OGTT (AU)                                        | 11.6±6.6  | 13.1±7.0 | 0.06 | 0.07 | Δ insulin sensitivity, OGTT                        | 1.9±6.1  | 1.7±6.3  | 0.6  | 0.9 |
| Non visceral fat (kg)*                                                | 23.4±10.2 | 23.1±9.9 | 0.9  | 0.9  | Δ Non visceral fat                                 | -2.3±3.2 | -1.9±3.4 | 0.6  | 0.9 |
| Visceral fat (kg)*                                                    | 3.2±1.9   | 2.9±1.8  | 0.1  | 0.3  | Δ Visceral fat                                     | -0.5±0.7 | -0.4±0.6 | 0.9  | 1.0 |
| Liver fat content (% of water signal)*                                | 7.1±7.6   | 5.2±6.2  | 0.1  | 0.3  | Δ Liver fat content                                | -2.6±5.6 | -1.9±5.9 | 0.9  | 0.8 |

Data represent means ± SD. BMI and total body fat were adjusted for sex and age. Glucose concentration, insulin secretion and insulin sensitivity were additionally adjusted for BMI.  $\Delta = T_{\text{follow up}} - T_{\text{baseline}}$ . The change in the parameters were additionally adjusted for baseline values. The change in glucose concentration, insulin secretion and insulin sensitivity were adjusted for the change in BMI. Data were statistically analyzed by multivariate linear regression analysis in the dominant inheritance model, p1, and the additive inheritance model, p2. \* MRI/MRS subcohort.
